# Supplementary material for: Active Fraction from Embryo Fish Extracts Induces Reversion of the Malignant Invasive Phenotype in Breast Cancer through Down-Regulation of TCTP and Modulation of E-cadherin/β-catenin Pathway
Source: PubMed Central journal article supplement (PMC6539734; doi:10.3390/ijms20092151), 2019-04-30
Supplement: ijms-20-02151-s001.pdf [file ijms-20-02151-s001.pdf]

## Supplementary Materials

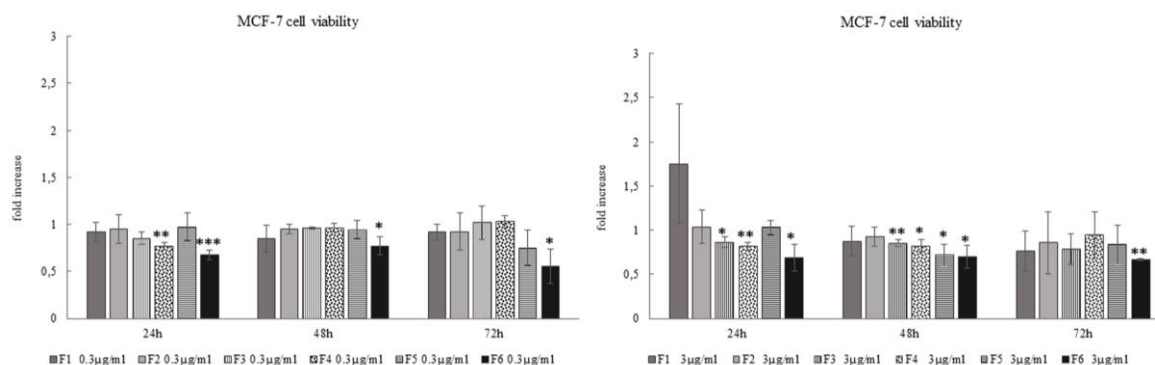

**Figure S1.** Sulforhodamine B (SRB) colorimetric assay performed in MCF-7 at 24 h, 48 h and 72 h.  $4 \times 10^4$  cells were seeded in a 96-multiwell and stimulated with F1, F2, F3, F4, F5, F6 at concentration of 0.1, 1, 10, 0.3, 3, 30 µg/mL respectively. 0.4% Sulforhodamine B Solution (Sigma-Aldrich Catalog Number S2902) was added in a sufficient amount to cover the culture surface area according to the manufacturer's instructions and absorbance at a wavelength of 565 nm was spectrophotometrically measured. (mean  $\pm$  S.E.,  $n = 3$ ); \*  $p < 0.05$ , \*\*  $p < 0.01$ , \*\*\*  $p < 0.001$  vs ctrl by the analysis of variance (ANOVA) followed by the Bonferroni post-test. Values are shown as fold increase vs ctrl.

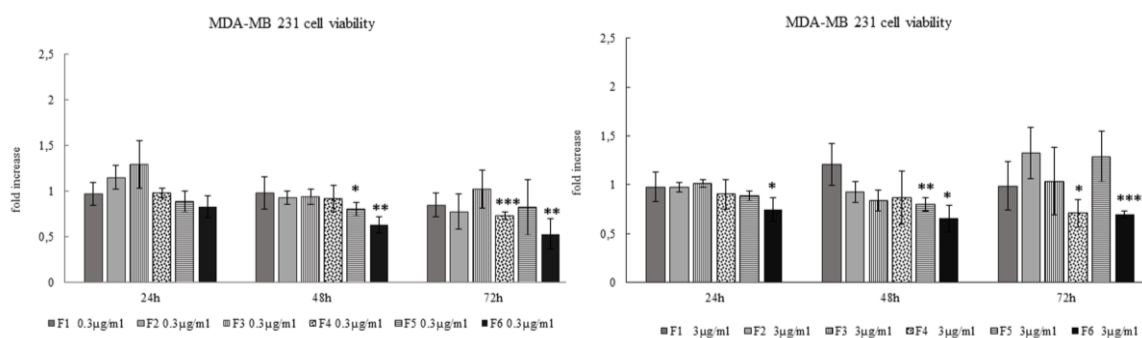

**Figure S2.** Sulforhodamine B (SRB) colorimetric assay performed in MDA-MB-231 at 24h, 48h and 72h.  $4 \times 10^4$  cells were seeded in a 96-multiwell and stimulated with F1, F2, F3, F4, F5, F6 at concentration of 0.1, 1, 10, 0.3, 3, 30 µg/mL respectively. 0.4% Sulforhodamine B Solution (Sigma-Aldrich Catalog Number S2902) was added in a sufficient amount to cover the culture surface area according to the manufacturer's instructions and absorbance at a wavelength of 565 nm was spectrophotometrically measured. (mean  $\pm$  S.E.,  $n = 3$ ); \*  $p < 0.05$ , \*\*  $p < 0.01$ , \*\*\*  $p < 0.001$  vs ctrl by the analysis of variance (ANOVA) followed by the Bonferroni post-test. Values are shown as fold increase vs ctrl.

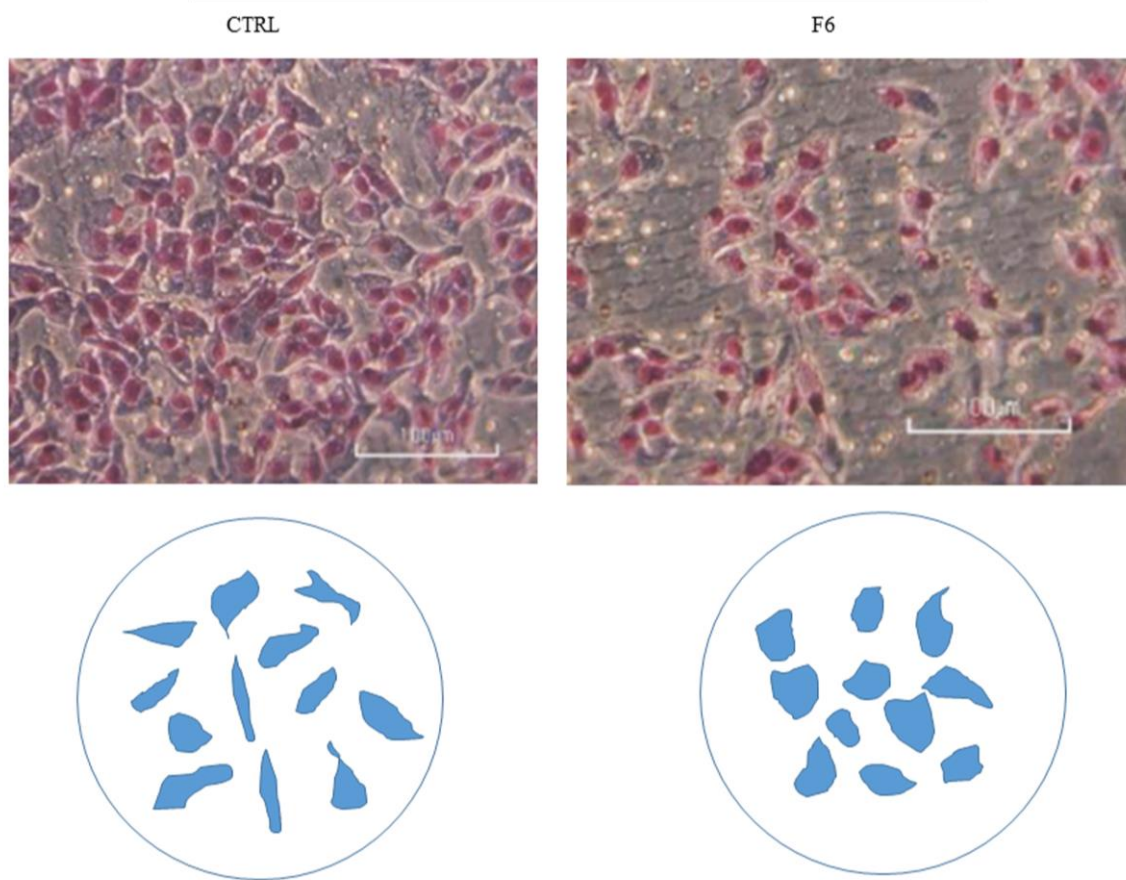

**Figure 3.** Embryo extracts induce cell shape remodeling. F6-treated cells recover a rounded shape, with reduced spreading and smaller nucleus in respect to control cells, characterized by elongated cytoplasm and higher nucleus/cytosol ratio. Some examples were cropped and highlighted.

**Table S1.** Sulforhodamine B (SRB) colorimetric assay performed in MCF-7 at 24h and 72h.

|      | MCF-7 viability test 24h |           |            |              |              |              |
|------|--------------------------|-----------|------------|--------------|--------------|--------------|
|      | 0.1 µg/ml                | 1 µg/ml   | 10 µg/ml   | 0.3 µg/ml    | 3 µg/ml      | 30 µg/ml     |
| ctrl | 1 ± 0.01                 | 1 ± 0.01  | 1 ± 0.01   | 1±0.02       | 1±0.02       | 1±0.02       |
| F1   | 1.05±0.02                | 1.05±0.12 | 1.19±0.02  | 0.85±0.1*    | 0.79±0.07**  | 0.77±0.05**  |
| F2   | 1.02±0.31                | 1.23±0.07 | 1.14±0.06  | 0.85±0.06**  | 0.85±0.07*   | 0.81±0.01*** |
| F3   | 1.08±0.16                | 1.17±0.11 | 1.03±0.12  | 0.81±0.03*** | 0.81±0.04*** | 0.82±0.09*   |
| F4   | 0.93±0.05*               | 0.95±0.05 | 0.80±0.12* | 0.80±0.12**  | 0.85±0.03*** | 0.78±0.02*** |
| F5   | 1.22±0.36                | 1.20±0.24 | 1.29±0.17  | 1.08±0.1     | 0.97±0.07    | 1.03±0.1     |
| F6   | 0.86±0.07**              | 1.13±0.34 | 1.25±0.07  | 0.72±0.1**   | 0.07±0.05*** | 0.78±0.17    |

  

|      | MCF-7 viability test 72h |           |              |             |             |              |
|------|--------------------------|-----------|--------------|-------------|-------------|--------------|
|      | 0.1 µg/ml                | 1 µg/ml   | 10 µg/ml     | 0.3 µg/ml   | 3 µg/ml     | 30 µg/ml     |
| ctrl | 1.0±0.03                 | 1.0±0.03  | 1.0±0.03     | 1.0±0.01    | 1.0±0.01    | 1.0±0.01     |
| F1   | 1.04±0.11                | 0.96±0.27 | 0.97±0.11    | 1.17±0.22   | 1.28±0.17   | 0.84±0.04*** |
| F2   | 1.30±0.12                | 0.93±0.13 | 1.13±0.12    | 1.05±0.03   | 1.25±0.11   | 0.79±0.12*   |
| F3   | 1.38±0.44                | 1.08±0.20 | 1.04±0.29    | 1.13±0.12   | 1.10±0.18   | 0.97±0.12    |
| F4   | 1.07±0.27                | 1.05±0.24 | 0.76±0.13*   | 1.06±0.07   | 1.07±0.17   | 0.83±0.05**  |
| F5   | 0.85±0.47                | 0.79±0.26 | 1.0±0.52     | 0.54±0.12** | 0.80±0.27   | 1.13±0.34    |
| F6   | 0.60±0.08**              | 0.61±0.37 | 0.56±0.05*** | 0.34±0.15** | 0.68±0.13** | 0.59±0.06*** |

$4 \times 10^4$  cells were seeded in a 96-multiwell and stimulated with F1, F2, F3, F4, F5, F6 at concentration of 0.1, 1, 10, 0.3, 3, 30 µg/mL respectively. 0.4% Sulforhodamine B Solution (Sigma-Aldrich Catalog Number S2902) was added in a sufficient amount to cover the culture surface area according to the manufacturer's instructions and absorbance at a wavelength of 565 nm was spectrophotometrically measured. (mean ± S.E.,  $n = 3$ ); \*  $p < 0.05$ , \*\*  $p < 0.01$ , \*\*\*  $p < 0.001$  vs ctrl by the analysis of variance (ANOVA) followed by the Bonferroni post-test. Values are shown as fold increase vs controls (ctrl).

**Table S2.** Sulforhodamine B (SRB) colorimetric assay performed in MDA-MB-231 at 24 h and 72 h.

|      | MDA-MB-231 viability test 24h |           |            |             |           |            |
|------|-------------------------------|-----------|------------|-------------|-----------|------------|
|      | 0.1 µg/ml                     | 1 µg/ml   | 10 µg/ml   | 0.3 µg/ml   | 3 µg/ml   | 30 µg/ml   |
| ctrl | 1 ± 0.01                      | 1 ± 0.01  | 1 ± 0.01   | 1±0.001     | 1±0.001   | 1±0.001    |
| F1   | 1.12±0.15                     | 0.95±0.05 | 1.05±0.1   | 0.90±0.20   | 0.90±0.16 | 1.33±0.38  |
| F2   | 1.15±0.001                    | 0.98±0.09 | 0.99±0.04  | 1.24±0.05   | 1.06±0.21 | 0.88±0.10* |
| F3   | 1.12±0.05                     | 1.08±0.23 | 0.90±0.11  | 1.11±0.05   | 1.18±0.25 | 1.01±0.13  |
| F4   | 0.79±0.27                     | 1.17±0.28 | 0.88±0.07* | 1.02±0.09   | 0.99±0.05 | 0.99±0.20  |
| F5   | 0.72±0.17*                    | 1.15±0.33 | 0.97±0.29  | 0.97±0.07   | 0.91±0.09 | 1.04±0.37  |
| F6   | 0.84±0.05**                   | 0.72±0.19 | 0.86±0.28  | 0.70±0.09** | 0.79±0.24 | 0.94±0.24  |

  

|      | MDA-MB-231 viability test 72h |              |             |              |             |           |
|------|-------------------------------|--------------|-------------|--------------|-------------|-----------|
|      | 0.1 µg/ml                     | 1 µg/ml      | 10 µg/ml    | 0.3 µg/ml    | 3 µg/ml     | 30 µg/ml  |
| ctrl | 1.0±0.001                     | 1.0±0.001    | 1.0±0.001   | 1.0±0.01     | 1.0±0.01    | 1.0±0.01  |
| F1   | 1.63±0.13                     | 1.24±0.23    | 1.56±0.06   | 0.92±0.08*** | 0.79±0.08** | 2.18±0.83 |
| F2   | 1.40±0.50                     | 1.30±0.13    | 1.34±0.18   | 0.56±0.08    | 0.91±0.13   | 1.86±0.63 |
| F3   | 0.80±0.26                     | 0.78±0.14*   | 0.87±0.15   | 0.86±0.09*   | 0.88±0.18   | 1.65±0.38 |
| F4   | 0.79±0.28                     | 0.56±0.03*** | 0.60±0.10** | 0.69±0.18*   | 0.58±0.11** | 1.37±0.36 |
| F5   | 0.56±0.22*                    | 0.76±0.15    | 0.84±0.23   | 0.68±0.14*   | 1.08±0.66   | 1.71±0.26 |
| F6   | 0.46±0.13**                   | 0.78±0.25    | 0.58±0.33   | 0.44±0.10*** | 0.72±0.21** | 1.92±0.43 |

4 × 10<sup>4</sup> cells were seeded in a 96-multiwell and stimulated with F1, F2, F3, F4, F5, F6 at concentration of 0.1, 1, 10, 0.3, 3, 30 µg/mL respectively. 0.4% Sulforhodamine B Solution (Sigma-Aldrich Catalog Number S2902) was added in a sufficient amount to cover the culture surface area according to the manufacturer's instructions and absorbance at a wavelength of 565 nm was spectrophotometrically measured. (mean ± S.E., n = 3); \* p < 0.05, \*\* p < 0.01, \*\*\* p < 0.001 vs ctrl by the analysis of variance (ANOVA) followed by the Bonferroni post-test. Values are shown as fold increase vs ctrl.
